# Supplementary material for: Three Molecular Modification Strategies to Improve the Thermostability of Xylanase XynA from Streptomyces rameus L2001
Source: MDPI journal article supplement (doi:10.3390/foods12040879), 2023-02-18
Supplement: s1 [file s1]

## Supplementary

Table S1. The primers used in this work.

| Primers | Sequences (5' - 3')                  |
|---------|--------------------------------------|
| Q24A-F  | CTCGTTCTGGACCGACGCG <b>GCG</b> GGCAC |
| Q24A-R  | GGTCATCGAGACCGTGCC <b>GCG</b> CG     |
| K104A-F | CGGCCCACGGGGACGTAC <b>GCG</b> GGCAG  |
| K104A-R | CACTGGTGACACTGCC <b>GCG</b> GTAC     |
| K143A-F | CGTGCGGCAGTCG <b>GCG</b> CGCACCGG    |
| K143A-R | GGTGCCGCCGGTGCG <b>GCG</b> CGACTGC   |
| V3C-F   | GATATACCATGGCCACGT <b>GCG</b> GCAC   |
| V3C-R   | GGTTCGTGGTGAC <b>GCA</b> CGTGG       |
| T30C-F  | GCACGGTCTCGATGT <b>GCG</b> CTGG      |
| T30C-R  | CCAG <b>GCA</b> CATCGAGACCGTGC       |
| N36C-F  | TGGCT <b>TGCT</b> TACAGCACCAGCTGGCG  |
| N36C-R  | CTGTAG <b>GCA</b> GCCACCGGAGCCCAG    |
| T188C-F | CAGCGGCAACTCCAATATCT <b>TGCG</b> TGT |
| T188C-R | GACAC <b>GCA</b> GATATTGGAGTTGCCGCTG |
| S109C-F | GGCAGTGTCACCT <b>TGCG</b> GACG       |
| S109C-R | CGTC <b>GCA</b> GGTGACACTGCC         |
| N153C-F | CACCATCACCACCGGCT <b>TGCC</b> ACTT   |
| N153C-R | TG <b>GCA</b> GCCGGTGGTGATGGTG       |

The mutated sites are marked red and bold.

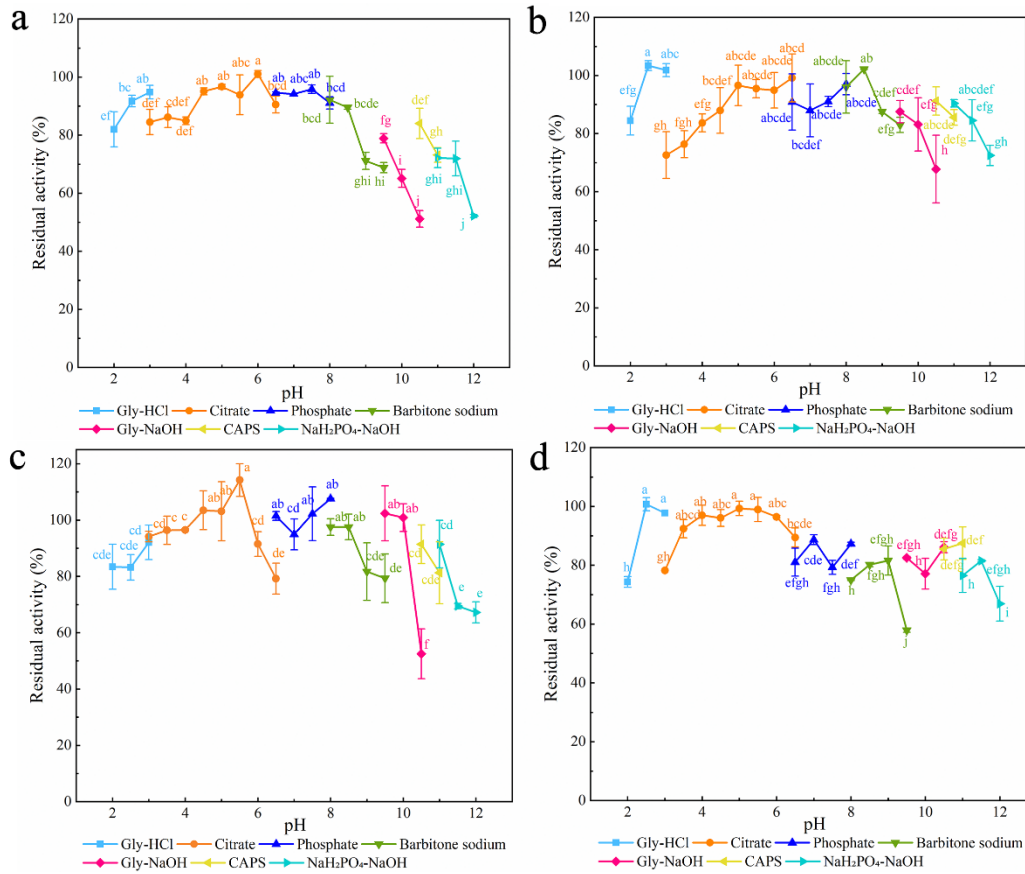

**Figure S1.** The pH stability of SER mutated enzyme and XynA. (a) Q24A; (b) K104A; (c) K143A; (d) XynA. pH stability was determined by incubating at varying pH from 2.0 to 12.0 at 37°C for 30 min, the activity of untreated xylanase was defined as 100%. Using beechwood xylan as substrate, buffers used were 50.00 mM Gly-HCl buffer (2.0–3.0), citrate buffer (pH 3.0–6.5), phosphate buffer (pH 6.5–8.0), barbital sodium buffer (pH 8.0–9.5), Gly-NaOH buffer (pH 9.5–10.5), CAPS buffer (pH 10.5–11.0), NaH<sub>2</sub>PO<sub>4</sub>-NaOH buffer (pH 11.0–12.0). Means within rows followed by the same letter were not significantly different ( $p < 0.05$ ).

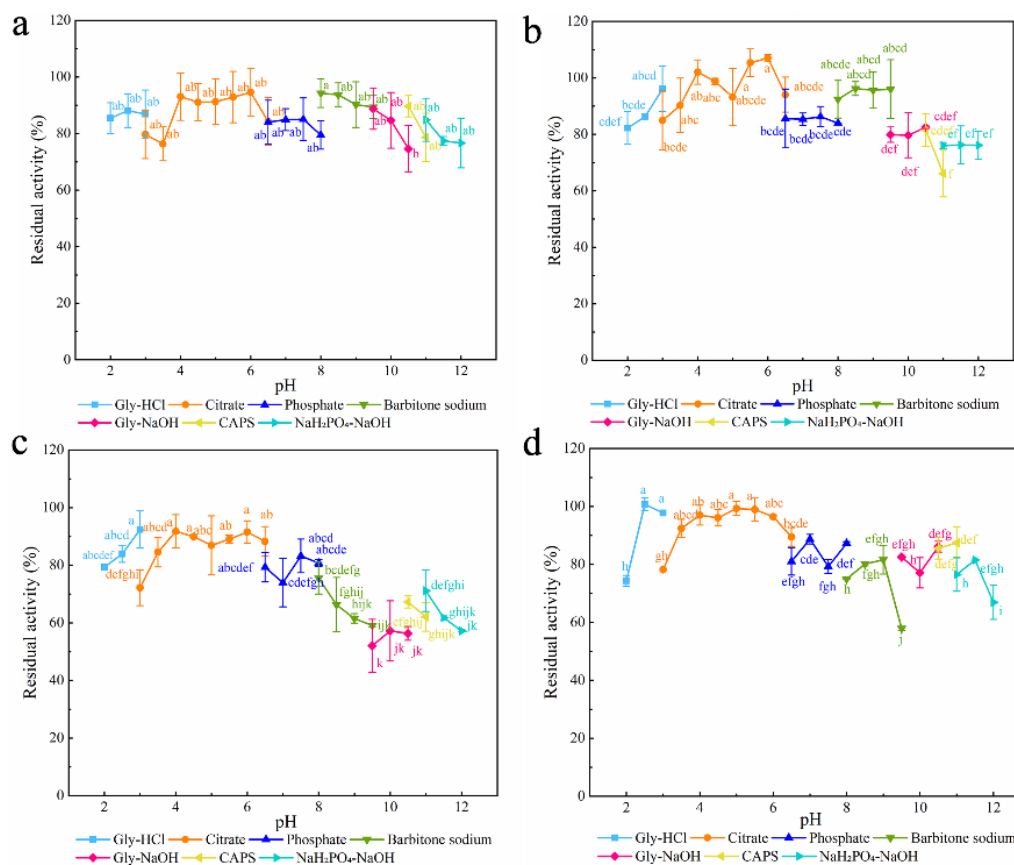

**Figure S2.** The pH stability of disulfide mutant enzyme and XynA. (a) XynA-VT; (b) XynA-NT; (c) XynA-SN; (d) XynA. pH stability was determined by incubating at varying pH from 2.0 to 12.0 at 37°C for 30 min, the activity of untreated xylanase was defined as 100%. Using beechwood xylan as substrate, buffers used were 50.00 mM Gly-HCl buffer (2.0–3.0), citrate buffer (pH 3.0–6.5), phosphate buffer (pH 6.5–8.0), barbitol sodium buffer (pH 8.0–9.5), Gly-NaOH buffer (pH 9.5–10.5), CAPS buffer (pH 10.5–11.0), NaH<sub>2</sub>PO<sub>4</sub>-NaOH buffer (pH 11.0–12.0). Means within rows followed by the same letter were not significantly different ( $p < 0.05$ ).
